# Supplementary material
Source: HighWire-hosted journal article supplement (https://msphere.asm.org/content/2/5/e00409-17)
Supplement: inline-supplementary-material-4 [file inline-supplementary-material-4.pdf]

## Supplementary Figure S4

### IMC1

Identity 72.1%; Similarity: 83.7%

|        |                                                                                                                                      |     |
|--------|--------------------------------------------------------------------------------------------------------------------------------------|-----|
| TgIMC1 | MFKDCADPCSDCCQPAEQQRGQATLPSHVLPQTS DSPAIHVTAEASQRLS-SPRALQQL                                                                         | 59  |
| SnIMC1 | MFQECCEKASNCQPSDEAALRENVARSSAIGEGRVAGAA-PAGTSQEQTNMAESSSS<br>*:*:*:*:*:*:*:*:*:*:*:*:*:*:*:*:*:*:*:*:*:*:*:*:*:*:*:*:*:*:*:*:*:*:*:  | 59  |
| TgIMC1 | HGTQESVRSVTLEERADRSRTVPIGEETERQWVAITAYQPIDTVTKTVEVPVVRTVETYY                                                                         | 119 |
| SnIMC1 | TQVQDAYQSVTLEERADRSRTAPVTEQTERQWVAITAYQPIDTVTKTVEVPVVRTVETYY<br>*:*:*:*:*:*:*:*:*:*:*:*:*:*:*:*:*:*:*:*:*:*:*:*:*:*:*:*:*:*:*:*:*:*: | 119 |
| TgIMC1 | PKVVVEEKIVEVPKYIPEYVEKVVVEPEVQYVDKIVEVPEYQYQYKYPKVIETKENIIQR                                                                         | 179 |
| SnIMC1 | PKVVVEEKIIQVPKYVPEYVEKVVVEPEVKYVDKLEIPDYQFQYKYPKVIETKENVIQR<br>*:*:*:*:*:*:*:*:*:*:*:*:*:*:*:*:*:*:*:*:*:*:*:*:*:*:*:*:*:*:*:*:*:*:  | 179 |
| TgIMC1 | PKYETKYIEKVVEVAQVKEVVRVYQDVEEVEEIIIRYVPKDSVPEEWKRIQEEQDKRAEAL                                                                        | 239 |
| SnIMC1 | PKYETKYTEKVVEVSQVKEVVRVYQEVVEEIIIRYVPKGHAIPEEWKRAQEEQQRREEEK<br>*:*:*:*:*:*:*:*:*:*:*:*:*:*:*:*:*:*:*:*:*:*:*:*:*:*:*:*:*:*:*:*:*:*: | 239 |
| TgIMC1 | KEKEAKEEEEELKGLLEERKLHEERVREQIKVQQQIIQQQLSARAEQERLLKERREAEMV                                                                         | 299 |
| SnIMC1 | KEKEAQEKQALEGLLAEKELQDKRMTDQQRIQQEIVQRQ---RAEHERIIKERKEAERL<br>*:*:*:*:*:*:*:*:*:*:*:*:*:*:*:*:*:*:*:*:*:*:*:*:*:*:*:*:*:*:*:*:*:*:  | 296 |
| TgIMC1 | HFPVAVGAPPLPTIPKVEQVFKPKVIKQVEIQKHVPIISVDVPPYMPKPVVVSQVQVPL                                                                          | 359 |
| SnIMC1 | QYGLPEGAPPMPFIPKVEQVFKPKVVKQVEIQKHVPIISVDVPPYMPKPVVVPVQVQVPL<br>*:*:*:*:*:*:*:*:*:*:*:*:*:*:*:*:*:*:*:*:*:*:*:*:*:*:*:*:*:*:*:*:*:*: | 356 |
| TgIMC1 | KFRDHFVVPVRRRVPRIRWTNEVYEVECIKEKPFQVQDVIKPVPCDVEIRVHEFVER                                                                            | 419 |
| SnIMC1 | KFRDHFVVPVRRRVIPRIRWTNEVYEVECIKEKPFQVQDVIKPVPCDVEIKVHEFVER<br>*:*:*:*:*:*:*:*:*:*:*:*:*:*:*:*:*:*:*:*:*:*:*:*:*:*:*:*:*:*:*:*:*:*:   | 416 |
| TgIMC1 | AAPINPAELSQADIHAMWVRNADLAEKRKQELGDKYPYVKHPAGTVFGEPGCSEEEGEV                                                                          | 479 |
| SnIMC1 | AAPINPAELSQADIHAMWVRNADLAEKRKAEELGDKYPYVKHPAGTVFGEPGCSEGEV<br>*:*:*:*:*:*:*:*:*:*:*:*:*:*:*:*:*:*:*:*:*:*:*:*:*:*:*:*:*:*:*:*:*:*:   | 476 |
| TgIMC1 | ESAQAEEGGQPAGAEPALALHPGHPLNMTYLQNEWIKKSTVTTHEMYTPEWFEAHQKALFN                                                                        | 539 |
| SnIMC1 | G-GEAQEGEAREGVEPLALHPGHPLNMTYLQNEWIKKETTATHEMYTPEWFEAHQKALHN<br>*:*:*:*:*:*:*:*:*:*:*:*:*:*:*:*:*:*:*:*:*:*:*:*:*:*:*:*:*:*:*:*:*:*: | 535 |
| TgIMC1 | LTMQPTQVQLSAEQAAKLQQEAQFGDAPWIEEAHAGVPMKPAAPEPEAAQCCVMCAV-                                                                           | 598 |
| SnIMC1 | LTMQHPTQVQLSAEQASQLQQEQPQFGAPWLDEGVTTQKKGRARDVADSQCCPVCNSV<br>*:*:*:*:*:*:*:*:*:*:*:*:*:*:*:*:*:*:*:*:*:*:*:*:*:*:*:*:*:*:*:*:*:*:   | 595 |
| TgIMC1 | -CGGDGVCRCQC                                                                                                                         | 609 |
| SnIMC1 | CGGDGVCCKCEC<br>*:*:*:*:*:*:                                                                                                         | 607 |

### IMC3

Full length protein identity 56.0%; Similarity: 66.8%

Fragment for antiserum generation identity 33.5%; Similarity: 43.7%

|        |                                                                           |     |
|--------|---------------------------------------------------------------------------|-----|
| TgIMC3 | -----MSDAGT-----PPAVQGELSQPQERVEVVVQPISESPDAS                             | 35  |
| SnIMC3 | MASPEADASSASPAGPGGATDTEVEQTPGIAAERRTGVLTEGGQQVQITIQIPAL---T               | 57  |
|        | * * * * * * * * * * * * * * * * * * * * * * * * * * * *                   |     |
| TgIMC3 | SEAEQAGVAAGAFHAEVYPYPPVSTGMPAPEQPAEMHLLPA-----NGQLPEI                     | 83  |
| SnIMC3 | GGPGSVQIEERTFHSEVYPYHPVVSATLPSQEGPKYGGSPAESAETAEAGRAVGVPVAV               | 117 |
|        | . . . : : * * * * * * * * * * * * * * * * * * * * * * * * * * *           |     |
| TgIMC3 | -AEGAETEGLLAPVARPPPQVMTALGPMPLPPEVRQKIPEKRVAKPIVEEREIYVSKKEVR             | 142 |
| SnIMC3 | YDADEVAGGAGPVARPPPQVMTALGPMPLPAEIRKKIPEKRVAKPIVEEREIVAKKEVQ               | 177 |
|        | . : * . * * * * * * * * * * * * * * * * * * * * * * * * * * * *           |     |
| TgIMC3 | ERTIEVPHVHYEHKFAEVARSLKIKKLVPRVREVVEIPREVIKPIVEEKVIEVPQGVKY               | 202 |
| SnIMC3 | ERTVEVPHVHYEHKFAEVATKLIKKLVPRVTEVIKEVPREVIKPIVEEKVIEVPQGVKY               | 237 |
|        | * * * * * * * * * * * * * * * * * * * * * * * * * * * * * * * *           |     |
| TgIMC3 | VEVPEVPCLYPKIVPKPKVQVIERIVETIKPVVKEKIVEVPTVVQIPKIKTVEVPY                  | 262 |
| SnIMC3 | VEVPEVPCMYPKIVAKPKIQVVERVETIKPVVKEKIVEVPTVVQIPKIKTVEVPY                   | 297 |
|        | * * * * * * * * * * * * * * * * * * * * * * * * * * * * * * * *           |     |
| TgIMC3 | YVPRYVEKVIPIPYQPPDAATLPLMVGGLPSRVSATMPTPFQVGPAGHANEVNLNPF                 | 322 |
| SnIMC3 | YVPRYVEKVIPIPYQPPDTATLPMVMGGLPSRITATMPTPFQVGPVAGQVSEFNLNPF                | 357 |
|        | * * * * * * * * * * * * * * * * * * * * * * * * * * * * * * * *           |     |
| TgIMC3 | ARVDVTVSQSPAGPHSPLSASPQTGTAASLK----LGRPATLVNPDRSAPAIIDLPEGFT              | 378 |
| SnIMC3 | AKVDIKVSHGPTGLSATFPA--PGLLPPQSVGGTDSGAATRMSPGSPGPAIELPEGFQ                | 415 |
|        | * : * : * : * : * : * : * : * : * : * : * : * : * : * : * : * :           |     |
| TgIMC3 | WGPPPNAPPGTFPA-----PAMPGPGAAGLPV                                          | 406 |
| SnIMC3 | WGPPPNAPPLTPLCQPVAGSIFSGTPGGGARAREGSVSLTGLPPSAVPGFPA--SGPAG               | 474 |
|        | * * * * * * * * * * * * * * * * * * * * * * * * * * * * * * * *           |     |
| TgIMC3 | GAADGLNMPPMITCPPEVGNVVFAGFLADPDILTRRGVMAYQGFKEGTFQMLFPPLAP                | 466 |
| SnIMC3 | GGPNVMNMPMITCPPEVGNVQVFSGLSDPDILTRSGVMAYQSFKRKGTQMLFPPLAP                 | 534 |
|        | * . : : * * * * * * * * * * * * * * * * * * * * * * * * * * * *           |     |
| TgIMC3 | QFGIPLDQGTGAPDVNTIVSVNEQMAQSRHHLIEDLQQQVESEFDQK-----VNASAMS               | 520 |
| SnIMC3 | QPGVPMNPPGTPDVRTLDQVASQAAGQGRHDVLEAIQKAEEHEHERASKAGLASVLSACAP             | 594 |
|        | * * * * * * * : * * * * * * . * . * * * * . * * * : * * * * * * * * * * * |     |
| TgIMC3 | CTPWASPAVQEREVVEEQ                                                        | 538 |
| SnIMC3 | CESCAPEVTPQREIVVEEQ                                                       | 612 |
|        | * * . . : * * * * * *                                                     |     |

# IMC7

Full length protein identity 24.5%; Similarity: 39.0%

Fragment for antiserum generation identity 23.6%; Similarity: 40.9%

|        |                                                                 |     |
|--------|-----------------------------------------------------------------|-----|
| TgIMC7 | -----MEFT-----ADNA                                              | 8   |
| SnIMC7 | MKGFTPQAYEGWCQPVAIPIIPNPGEYTMRSCTRWGACCGTWKRMYPYQTFPLITTYVRGA   | 60  |
|        | * : . . *                                                       |     |
| TgIMC7 | APLTEQNAPQDV--EAVKPDVIENAAETANEESAAPTLKRLVSKTTHIKTVTESLSRKQT    | 66  |
| SnIMC7 | LPYIEHEKLMSTNGLAVAPQRAAVKVRVSGSKTSPMVGNGTQITMVGSGTQITIPVVG      | 120 |
|        | * * : . . * * : . . . . . : * : . . . * : : * : : *             |     |
| TgIMC7 | KEI-----TTNTLHMGWKETKEAFLAPRSTITHADGSESEIARFVPSVQVVDLPLDLVYT    | 121 |
| SnIMC7 | QTIPVVGSGTQITIPVREVTEENTCMK-----PRVLTQVIECEDTKY                 | 161 |
|        | : * * : * : * : : : * * . : : .                                 |     |
| TgIMC7 | VPEVKTRMVNYIFECFARGHSRLVPREFPVDTPFVVPQYQDVSVPVVMSQTFVPELQETS    | 181 |
| SnIMC7 | IPKVEVRTVQRTIEVASKTEKRFVPREVPVDTPFIVPRFEDRDVPVVVSNTISPEIBETE    | 221 |
|        | : * : . * * : * : . . : * * * * * : * : * * * * * : * * : * * : |     |
| TgIMC7 | RVVQVPVARYVPKLVPVDVFPVPRVAIPIKAGEVTQVSKNTVISDDLMRQLSVEMNPHLE    | 241 |
| SnIMC7 | AVVEVPVARYVPHLVPINVYVPRVAIPVVLDESQEAAPALPTESLQQLIKELNPHLE       | 281 |
|        | * * : * * * * * : * * : * * * * * : : : . : : : : * * * * * :   |     |
| TgIMC7 | ALNQFNAQQAQVMNNVVARAQELATQMDCPVPSREKIEVNASAGSGAGATIVDEQGNKQL    | 301 |
| SnIMC7 | EIDKFNAGQNVKFQELLEKSQKAANFAKCPVPEPQSTPILKITEIEPEGE-ESDHLVKQI    | 340 |
|        | : : * * * * : : : : : * : * . * * * * . : : : : . : : * * :     |     |
| TgIMC7 | QLDMGGKELRSVEMVFKRLHDDINTSKCVEENMQITEDIILCVHRDLNGGRLESFPGNA     | 361 |
| SnIMC7 | CFSTGGYQAAEVESLFTALTATSTTDSEAD-----TSAHKGMSGEQTDPDPT----        | 387 |
|        | : . * * : . * * : * . * . * . . : : . . * : : * : :             |     |
| TgIMC7 | GIPMIFRAPDQKPSVANGLPERVPLRSLTNDLSHAAAQNESATTTGEASLPTALNAEQ      | 421 |
| SnIMC7 | -----HDDMLSAATGASDSQRCTSV---MSGKDATEGVAAVASGKASATTEERKSDA       | 436 |
|        | * : * * . * : * : * * * : * : * * * * * * . . :                 |     |
| TgIMC7 | TTAVPIAA                                                        | 429 |
| SnIMC7 | SKA----A                                                        | 440 |
|        | : . * *                                                         |     |

# IMC15

Full length protein identity 25.5%; Similarity: 34.7%

Fragment for antiserum generation identity 15.8%; Similarity: 23.8%

|         |                                                                                                                                           |     |
|---------|-------------------------------------------------------------------------------------------------------------------------------------------|-----|
| TgIMC15 | -----                                                                                                                                     | 0   |
| SnIMC15 | MAFDLPKVPRLPEPGSAAVPLPSLPSFAAAAATHRPLRCLGTFIVEATPASAGAQTKR                                                                                | 60  |
| TgIMC15 | -----                                                                                                                                     | 0   |
| SnIMC15 | RATRSSSCCHSRFCFRSSSCRRYSMTSTSGNRDTSSSSVTASNTANSSQPAGLRDNSKGS                                                                              | 120 |
| TgIMC15 | ----- <b>MRICLPPVPQGREAVPDASANVRRQAFSERFRQCEHER</b>                                                                                       | 38  |
| SnIMC15 | FASLCCNGEAAAAASFQGYSDVHGCYPPPAAGARGDDGSRNGMPKHVVDQK-----NVA<br>:: * ** * .. .: .: ::::: : :                                               | 175 |
| TgIMC15 | <b>LPSGVPRPQTTPRCSGTILIEPAPTGTNNRQQAPTGRCDMSGSCASV-----A-E</b>                                                                            | 87  |
| SnIMC15 | AAAAVDDCLVPACRSRINGS CFL--RNCCPEEGAAASVAPSCAPAAAHVLRPEEAKA<br>:. * . * ** : * . . * . . : : *** . *                                       | 232 |
| TgIMC15 | <b>SAAACLWQTSPRRWRPTPREPKMCFEEPSQSL-----RFRTSPRPFSCAETTR--M</b>                                                                           | 139 |
| SnIMC15 | GSSCCCFARRSR-ASSSPSTASPCVPNGLIPRPRVLTAGTAVTPRRFSFTDLRSATVL<br>.:::** : * : * . * . : ** *** :: : :                                        | 291 |
| TgIMC15 | <b>CTTPCSSTD-----DR-----CTSRRSIYGTPQIQT-----FSASS-</b>                                                                                    | 170 |
| SnIMC15 | PSPPARTTAAAPPQEKHQMLQQQLQQQQQLQQQQQLQQQQQLQQQQQLQQQQQLQQQQQL<br>: * . : * : : . : : : * : * : : . .                                       | 351 |
| TgIMC15 | <b>-AGTQAYIRPLGQSSRSVSPWQSALAPASSAVSSTETH---GIGI-----Y</b>                                                                                | 213 |
| SnIMC15 | QLQQQQQLQQQQQRPFTTFWWEPS TDSASSCCRAGQAKEQRQLLLHAATAPLPLSSSL<br>* : : * : . * : : * * . : : : : :                                          | 411 |
| TgIMC15 | <b>ATQSQQASHVRVTGGVDSILGPSAPA-----P--TVSSP-----SHIP</b>                                                                                   | 249 |
| SnIMC15 | HAPHPLAVHIYGGLESLVAVALSLLGNSNIGLLGNLFLPATAKKKSTTPQLNRAP<br>: . : * : : * * : : : . * : : * : . . : : *                                    | 471 |
| TgIMC15 | <b>AFSQSSCGSTNSAPGNGQS-----TWCQTSPTVTVGGQANA</b>                                                                                          | 284 |
| SnIMC15 | ALKEAA---FSSPGKERRKSRDAGPPCLSGTTSRMTTASSMSPFCSSPPCNSSGSSTP<br>* : : : : * : * : : : * . : * . * . : .                                     | 527 |
| TgIMC15 | <b>SA-QVKI--AQAPAAASSQPNYSRAKT TQAVVEQKMVPEGYDRVEHMPRLRPVSVVENR</b>                                                                       | 341 |
| SnIMC15 | PSFHHRQASSWSPRRGLGAP-VAATGQSGVVENQLLRNEGYEKHEVIVPLLRPVKIVEKQ<br>: : : : : * . . * : : : . * : * : * * : : * * * * . : * * : *             | 586 |
| TgIMC15 | <b>IEIPVVKVVD</b> TIVHKQKIEERIRFVDKPVQVEVEKFVEVPEVIYSDVIVEVPEIVEVIKH                                                                      | 401 |
| SnIMC15 | VEVPLIKRVDTVVPAARIEEKITFIDKPIVQQVERFVEVPEVHYTDVIVEVPEVIHVEKR<br>: * : * : * * * : * : * * : * * * : * * : * * * * * * * * * * * : * * :   | 646 |
| TgIMC15 | VPKEEIRENITYVPRFETKIIPKYVDVPIIKIVDRYEEVHEIHEVLKPVAKVKVVDVPKE                                                                              | 461 |
| SnIMC15 | VPKEKIVENVIVPRFEELIPKYVEVPVKIVDRYEEVQTEEV LKLVKPVKVVVEVPRE<br>* * * * : * * : : * * * * : * * * * : * * : * * * * * * : : * * * * : * * : | 706 |
| TgIMC15 | FTRIVPKYSVHKTKSKVSVPDIQYKEVPRYRMRYEPKILRDTVINHIPQYLDIEVPYVEVP                                                                             | 521 |
| SnIMC15 | VLRVVPKYVVHKTKEIPVVLQHKVPVRYKMRYPKIIQGVKVIPQIKDVEIPYPVP<br>. * : * * * * * * . : : * * : * * * * : * * * * * * : : * : * * * * * * * *    | 766 |
| TgIMC15 | KVTVDVQPFVTTYRDHQYVVPVSHSVTPVLLPGDHTQVVDVPEKPYVVVHDKFTPR-P                                                                                | 580 |
| SnIMC15 | VVKEVPAPYFVEKYRDRPVAVPVSHLVLPVFKEGSHAQQVDVAVPTVLLVHDQLQPMAR<br>* . * * * : * * . * * : * * * * * * * : * . * : * * * * * . * : * * * : *  | 826 |
| TgIMC15 | PIPELIPGQAVLRGVTHLTKERLTAEQEQQLARQTTPSRPASPDHRFWEREREAE LRAPL                                                                             | 640 |
| SnIMC15 | PVPQLLAGAAAATA-QPLDRCLNPEQRGS-----PATPM--LF-----<br>* : * : * * . . * * . * . * * : . * * : * * : : :                                     | 862 |
| TgIMC15 | SPVHIRPPRQRKFFAGMPRQSCGPMPSVDAQCQSPWQHVOQTNTLSYPN                                                                                         | 692 |
| SnIMC15 | -----                                                                                                                                     | 862 |
